# Supplementary material for: Quantitative analysis of phase topology evolution during three-phase displacements in porous media
Source: Royal Society of Chemistry journal article supplement (doi:10.1039/d0lc00232a), 2020-01-01
Supplement: d0lc00232a1.pdf [file d0lc00232a1.pdf]

## Lab on a Chip Supplementary Information

**Title:** Quantitative analysis of phase topology evolution during three-phase displacements in porous media

**Authors:** Kofi Osei-Bonsu, Saeid Khorsandi, Mohammad Piri

## S.1 Topological parameters

**Table S.1.** Topological parameters of WAG1 experiment at the end of each injection period.

|                | OI      | WF1     | GF1    | WF2     | GF2    | WF3     |
|----------------|---------|---------|--------|---------|--------|---------|
| $S_w$          | 0.3526  | 0.5655  | 0.3492 | 0.5430  | 0.3359 | 0.4954  |
| $S_o$          | 0.6473  | 0.4345  | 0.4460 | 0.3600  | 0.3744 | 0.3179  |
| $S_g$          | 0.0000  | 0.0000  | 0.2048 | 0.0970  | 0.2897 | 0.1866  |
| $\chi_w$       | 371.00  | -129.00 | 238.00 | -213.00 | 303.00 | -54.000 |
| $\chi_o$       | -63.000 | 114.00  | 305.00 | 251.00  | 361.00 | 312.00  |
| $\chi_g$       | -       | -       | 14.000 | 28.000  | 42.000 | 38.000  |
| $\hat{\chi}_w$ | 0.6587  | 0.9033  | 0.7296 | 0.9347  | 0.6874 | 0.8806  |
| $\hat{\chi}_o$ | 0.8784  | 0.8096  | 0.7291 | 0.7266  | 0.6756 | 0.6723  |
| $\hat{\chi}_g$ | -       | -       | 0.8467 | 0.8046  | 0.8320 | 0.8209  |
| $S_{cw}$       | 0.1152  | 0.8059  | 0.2773 | 0.7549  | 0.1130 | 0.8045  |
| $S_{co}$       | 0.9440  | 0.1032  | 0.1092 | 0.0660  | 0.0407 | 0.0510  |
| $S_{cg}$       | -       | -       | 0.3248 | 0.0915  | 0.2066 | 0.0919  |
| $\alpha_w$     | 465010  | 281806  | 535614 | 309255  | 602715 | 353349  |
| $\alpha_o$     | 253276  | 366814  | 387411 | 440177  | 486959 | 493849  |
| $\alpha_g$     | -       | -       | 179124 | 1897289 | 213848 | 201200  |

**Table S.2.** Topological parameters of SAG experiment at the end of each injection period.

|                | OI      | WF1     | GF1    | WF2      | GF2    | WF3     |
|----------------|---------|---------|--------|----------|--------|---------|
| $S_w$          | 0.3368  | 0.6148  | 0.2934 | 0.6279   | 0.1635 | 0.4098  |
| $S_o$          | 0.6631  | 0.3852  | 0.5059 | 0.2851   | 0.3574 | 0.2465  |
| $S_g$          | 0.0000  | 0.0000  | 0.2007 | 0.0870   | 0.4791 | 0.3437  |
| $\chi_w$       | 394.00  | -224.00 | 81.000 | -644.00  | 604.00 | -134.00 |
| $\chi_o$       | -137.00 | 150.00  | 708.00 | 854.00   | 707.00 | 958.00  |
| $\chi_g$       | -       | -       | 18.000 | 37.000   | 23.000 | 67.000  |
| $\hat{\chi}_w$ | 0.6363  | 0.9294  | 0.8070 | 1.0557   | 0.1541 | 0.9222  |
| $\hat{\chi}_o$ | 0.8992  | 0.7854  | 0.5924 | 0.2874   | 0.4818 | 0.1171  |
| $\hat{\chi}_g$ |         |         | 0.8426 | 0.7784   | 0.8506 | 0.8225  |
| $S_{cw}$       | 0.0506  | 0.7762  | 0.1303 | 0.9122   | 0.0518 | 0.7557  |
| $S_{co}$       | 0.9917  | 0.1140  | 0.0910 | 0.0507   | 0.0671 | 0.0427  |
| $S_{cg}$       | -       | -       | 0.6711 | 0.3105   | 0.3122 | 0.1935  |
| $\alpha_w$     | 516358  | 228360  | 941913 | 292466.6 | 197380 | 194721  |
| $\alpha_o$     | 262238  | 364442  | 563545 | 630690.6 | 211484 | 185537  |
| $\alpha_g$     | -       | -       | 148711 | 195357   | 126122 | 147052  |

**Table S.3.** Topological parameters of WAG2 experiment at the end of each injection period.

|                | OI      | WF1    | GF1    | WF2    | GF2    | WF3    |
|----------------|---------|--------|--------|--------|--------|--------|
| $S_w$          | 0.1557  | 0.4053 | 0.2638 | 0.4057 | 0.2589 | 0.4250 |
| $S_o$          | 0.8442  | 0.5946 | 0.5950 | 0.5209 | 0.5361 | 0.4800 |
| $S_g$          | 0.0000  | 0.0000 | 0.1411 | 0.0733 | 0.2049 | 0.0950 |
| $\chi_w$       | 662.00  | 464.00 | 790.00 | 579.00 | 791.00 | 523.00 |
| $\chi_o$       | -217.00 | 94.000 | 144.00 | 216.00 | 245.00 | 237.00 |
| $\chi_g$       | -       | -      | 24.000 | 34.000 | 42.000 | 54.000 |
| $\hat{\chi}_w$ | 0.0475  | 0.6410 | 0.2877 | 0.5870 | 0.2760 | 0.6247 |
| $\hat{\chi}_o$ | 0.9089  | 0.8295 | 0.8135 | 0.7805 | 0.7724 | 0.7654 |
| $\hat{\chi}_g$ | -       | -      | 0.8272 | 0.7712 | 0.8206 | 0.7512 |
| $S_{cw}$       | 0.0388  | 0.3589 | 0.0534 | 0.5415 | 0.0320 | 0.4975 |
| $S_{co}$       | 0.9943  | 0.2737 | 0.5200 | 0.0970 | 0.1426 | 0.1112 |
| $S_{cg}$       | -       | -      | 0.4306 | 0.1509 | 0.4785 | 0.1135 |
| $\alpha_w$     | 413137  | 297297 | 488735 | 353803 | 504420 | 334166 |
| $\alpha_o$     | 76198   | 202654 | 239124 | 282786 | 281184 | 304144 |
| $\alpha_g$     | -       | -      | 158276 | 231299 | 179722 | 229445 |

## S.2 EOS approach to model three phase relative permeability

The value of  $\phi_r$  as defined by Khorsandi et al. (2017) is calculated for the oil phase in the three experiments.

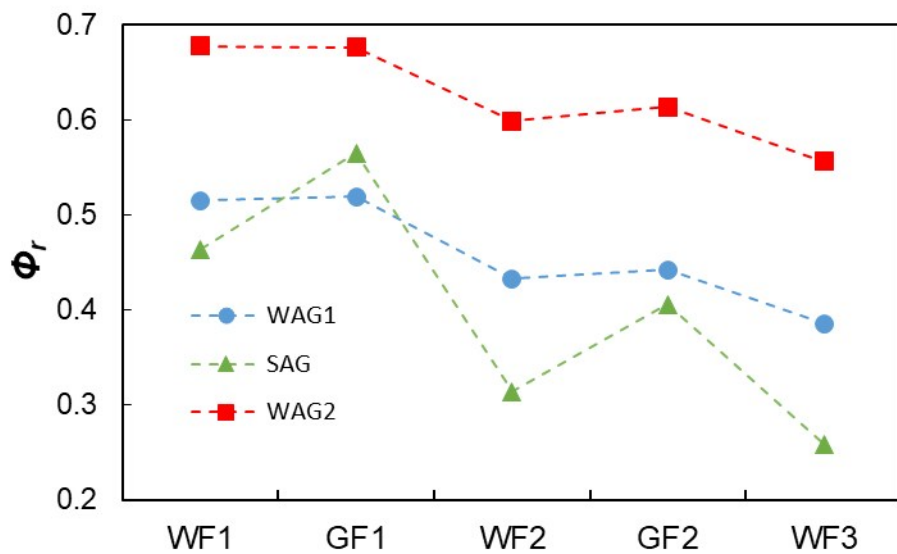

**Fig S1.** The value of  $\phi_r$  for oil phase in the three experiments. The value of  $\phi_r$  keep decreasing in each cycle.
